# Supplementary material for: Report from the HarmoSter study: inter-laboratory comparison of LC-MS/MS measurements of corticosterone, 11-deoxycortisol and cortisone
Source: publisher site journal article supplement (doi:10.1515/cclm-2022-0242), 2022-10-26
Supplement: Supplementary file 1 [file j_cclm-2022-0242_suppl_001.docx]

**Supplemental Figure 1.** Intra-laboratory Passing and Bablok comparison of results obtained by *in-house* and external calibration within laboratories using Chromsystems’ material for *in house* calibration.

**CORTICOSTERONE**

**11-DEOXYCORTISOL**

**CORTISONE**

**Lab D**

*In house* calibration (nmol/L)


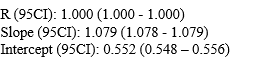

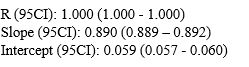

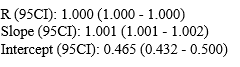

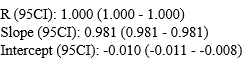

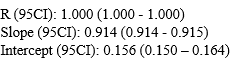

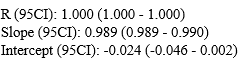

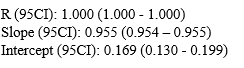

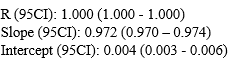


**Lab E**

*In house* calibration (nmol/L)


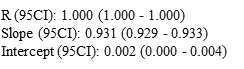


**Lab L**

*In house* calibration (nmol/L)

External calibration (nmol/L)

External calibration (nmol/L)

External calibration (nmol/L)

**Supplemental Figure 2.** Bland-Altman plot of corticosterone measurements as function of the calibration system.

**Lab B % bias**

**Lab C % bias**

**Lab D % bias**

***In house* calibration**

**External calibration**

**Lab E % bias**

**Lab G % bias**

**Lab H % bias**

**Lab I % bias**

**Lab L % bias**

*Bias (%) = ((laboratory value – median of all laboratories) / median of all laboratories) x 100.*

Continuous and broken lines: mean bias and 95% agreement interval. Dashed line: 0% bias.

**Supplemental Figure 3.** Bland-Altman plot of 11-deoxycortisol measurements as function of the calibration system.

***In house* calibration**

**External calibration**

*Bias (%) = ((laboratory value – median of all laboratories) / median of all laboratories) x 100.*

Continuous and broken lines: mean bias and 95% agreement interval. Dashed line: 0% bias.

**Lab B % bias**

**Lab C % bias**

**Lab D % bias**

**Lab L % bias**

**Lab E % bias**

**Lab G % bias**

**Lab H % bias**

**Lab I % bias**

**Supplemental Figure 4.** Bland-Altman plot of cortisone measurements as function of the calibration system.

**Lab B % bias**

***In house* calibration**

**External calibration**

*Bias (%) = ((laboratory value – median of all laboratories) / median of all laboratories) x 100.*

Continuous and broken lines: mean bias and 95% agreement interval. Dashed line: 0% bias.

**Lab C % bias**

**Lab D % bias**

**Lab E % bias**

**Lab G % bias**

**Lab H % bias**

**Lab I % bias**

**Lab L % bias**
