# Supplementary material for: Report from the HarmoSter study: inter-laboratory comparison of LC-MS/MS measurements of corticosterone, 11-deoxycortisol and cortisone
Source: publisher site journal article supplement (doi:10.1515/cclm-2022-0242), 2022-10-26
Supplement: Supplementary file 5 [file j_cclm-2022-0242_suppl_003.xlsx]

## Sheet: Suppl. Table 2
Supplemental Table 2. List of sample intra-laboratory CV and use in the study analyses of corticosterone measurements
SUBJECT ID	Specimen/EQA	All lab median	Lab B			Lab C			Lab D			Lab E			Lab G			Lab H			Lab I			Lab L
		(nmol/L)	Duplicate measurement CV (%)	used in intra-lab study	used in inter-lab study	Duplicate measurement CV (%)	used in intra-lab study	used in inter-lab study	Duplicate measurement CV (%)	used in intra-lab study	used in inter-lab study	Duplicate measurement CV (%)	used in intra-lab study	used in inter-lab study	Duplicate measurement CV (%)	used in intra-lab study	used in inter-lab study	Duplicate measurement CV (%)	used in intra-lab study	used in inter-lab study	Duplicate measurement CV (%)	used in intra-lab study	used in inter-lab study	Duplicate measurement CV (%)	used in intra-lab study	used in inter-lab study
A01	serum-gel	13.7577	3.88947	Y	Y	14.5758	Y	Y	2.55361	Y	Y	7.84504	Y	Y	3.70843	Y	Y	0.0601824	Y	Y	1.69728	Y	Y	8.74105	Y	Y
A01	plasma-hep	13.4425	4.08344	Y	Y	2.25771	Y	Y	9.11005	Y	Y	4.96766	Y	Y	0.222536	Y	Y	1.61233	Y	Y	2.59886	Y	Y	9.17618	Y	Y
A01	serum-beads	13.5852	5.26363	Y	Y	3.58554	Y	Y	6.55085	Y	Y	0.427317	Y	Y	2.73359	Y	Y	1.64617	Y	Y	4.74922	Y	Y	9.36066	Y	Y
A02	serum-gel	10.4816	5.86983	Y	Y	7.79967	Y	Y	9.07274	Y	Y	4.62408	Y	Y	8.91224	Y	Y	2.76873	Y	Y	0.959039	Y	Y	6.86224	Y	Y
A02	plasma-hep	10.0849	6.55286	Y	Y	17.3639	Y	Y	5.92645	Y	Y	2.91653	Y	Y	7.23045	Y	Y	2.57761	Y	Y	1.45954	Y	Y	2.18397	Y	Y
A02	serum-beads	10.279	0.0888851	Y	Y	2.86504	Y	Y	1.55825	Y	Y	0.105072	Y	Y	2.87776	Y	Y	3.28868	Y	Y	1.86572	Y	Y	7.82361	Y	Y
A03	serum-gel	8.13779	0.188381	Y	Y	1.6313	Y	Y	2.23046	Y	Y	6.24822	Y	Y	0.182009	Y	Y	2.42906	Y	Y	0	Y	Y	8.59948	Y	Y
A03	plasma-hep	7.60335	7.43972	Y	Y	7.41373	Y	Y	1.06637	Y	Y	0.110818	Y	Y	2.24776	Y	Y	0.39128	Y	Y	5.88051	Y	Y	8.07992	Y	Y
A03	serum-beads	7.68148	3.97964	Y	Y	2.1052	Y	Y	7.30686	Y	Y	4.21019	Y	Y	1.72934	Y	Y	0.234553	Y	Y	0.376121	Y	Y	4.81116	Y	Y
A04	serum-gel	35.9113	3.86152	Y	Y	0.713529	Y	Y	0.517111	Y	Y	3.60888	Y	Y	3.53208	Y	Y	3.68588	Y	Y	1.13999	Y	Y	5.83463	Y	Y
A04	plasma-hep	35.6319	1.54337	Y	Y	2.35167	Y	Y	3.46408	Y	Y	3.69842	Y	Y	1.35584	Y	Y	6.27344	Y	Y	2.57816	Y	Y	4.51018	Y	Y
A04	serum-beads	36.2215	1.87827	Y	Y	1.84443	Y	Y	2.71344	Y	Y	7.10337	Y	Y	0.471274	Y	Y	2.16688	Y	Y	0.437321	Y	Y	0.294332	Y	Y
A05	serum-gel	38.4941	0.496681	Y	Y	4.80739	Y	Y	3.91404	Y	Y	2.60199	Y	Y	2.13143	Y	Y	0.914702	Y	Y	1.9103	Y	Y	7.10807	Y	Y
A05	plasma-hep	37.6109	2.06224	Y	Y	2.74263	Y	Y	3.16755	Y	Y	1.89654	Y	Y	6.22746	Y	Y	5.27412	Y	Y	1.60684	Y	Y	1.97797	Y	Y
A05	serum-beads	38.1675	0.699671	Y	Y	5.796	Y	Y	0.49842	Y	Y	6.37633	Y	Y	5.06661	Y	Y	4.93481	Y	Y	0.600639	Y	Y	8.46202	Y	Y
A06	serum-gel	4.22981	3.3886	Y	Y	2.87119	Y	Y	3.64233	Y	Y	6.349	Y	Y	2.09513	Y	Y	1.17032	Y	Y	1.68136	Y	Y	10.1927	Y	Y
A06	plasma-hep	4.24519	0.509153	Y	Y	0.298735	Y	Y	1.36618	Y	Y	3.32557	Y	Y	4.58473	Y	Y	2.36237	Y	Y	1.66378	Y	Y	0.931279	Y	Y
A06	serum-beads	4.18679	2.18945	Y	Y	13.8845	Y	Y	3.06866	Y	Y	14.0789	Y	Y	5.06282	Y	Y	7.24415	Y	Y	6.43615	Y	Y	4.84118	Y	Y
A07	serum-gel	38.5171	0.456539	Y	Y	2.5713	Y	Y	2.09736	Y	Y	3.51167	Y	Y	4.69004	Y	Y	0.556226	Y	Y	1.36771	Y	Y	3.9658	Y	Y
A07	plasma-hep	35.398	2.24566	Y	Y	2.38414	Y	Y	1.55471	Y	Y	4.0066	Y	Y	2.29936	Y	Y	4.03863	Y	Y	2.03351	Y	Y	4.43039	Y	Y
A07	serum-beads	36.9237	0.880987	Y	Y	0.91026	Y	Y	3.78265	Y	Y	6.13515	Y	Y	1.36457	Y	Y	4.10984	Y	Y	7.12774	Y	Y	9.11481	Y	Y
A08	serum-gel	18.6244	5.68188	Y	Y	4.20462	Y	Y	1.95121	Y	Y	0.52518	Y	Y	2.95507	Y	Y	0.252922	Y	Y	3.85847	Y	Y	6.15971	Y	Y
A08	plasma-hep	17.4455	2.56903	Y	Y	3.07884	Y	Y	2.11795	Y	Y	6.98845	Y	Y	10.9543	Y	Y	3.69417	Y	Y	n.a.	N*	N*	4.85946	Y	Y
A08	serum-beads	17.9931	3.75054	Y	Y	4.11193	Y	Y	2.09213	Y	Y	4.31353	Y	Y	1.24159	Y	Y	7.5064	Y	Y	0.663561	Y	Y	5.68217	Y	Y
A09	serum-gel	10.3732	0.80912	Y	Y	5.83606	Y	Y	4.51114	Y	Y	0.75426	Y	Y	3.06924	Y	Y	3.53967	Y	Y	3.43924	Y	Y	0.758871	Y	Y
A09	plasma-hep	10.2304	6.58598	Y	Y	1.99847	Y	Y	5.96367	Y	Y	5.04281	Y	Y	7.04665	Y	Y	6.62523	Y	Y	n.a.	N*	N*	0.298768	Y	Y
A09	serum-beads	10.1505	0.145656	Y	Y	7.13865	Y	Y	4.39073	Y	Y	5.75362	Y	Y	2.53394	Y	Y	5.11497	Y	Y	3.71977	Y	Y	7.78993	Y	Y
A10	serum-gel	61.9708	10.2244	Y	Y	0.829672	Y	Y	0.495487	Y	Y	4.83982	Y	Y	1.62525	Y	Y	4.70344	Y	Y	0.448482	Y	Y	2.47803	Y	Y
A10	plasma-hep	59.4827	7.65123	Y	Y	1.8308	Y	Y	2.58832	Y	Y	7.71435	Y	Y	1.1904	Y	Y	3.85503	Y	Y	3.53839	Y	Y	1.46933	Y	Y
A10	serum-beads	60.6167	0.95286	Y	Y	3.95168	Y	Y	6.07782	Y	Y	0.211376	Y	Y	0.349534	Y	Y	4.09892	Y	Y	3.66981	Y	Y	6.47246	Y	Y
A11	serum-gel	95.3993	1.16041	Y	Y	3.02305	Y	Y	1.6133	Y	Y	7.15196	Y	Y	0.645192	Y	Y	0.130195	Y	Y	0.33914	Y	Y	16.4942	Y	Y
A11	plasma-hep	89.4989	0.663178	Y	Y	1.8609	Y	Y	3.2262	Y	Y	4.04526	Y	Y	6.70974	Y	Y	2.30078	Y	Y	7.05308	Y	Y	2.24853	Y	Y
A11	serum-beads	91.7305	2.04464	Y	Y	1.37918	Y	Y	3.05527	Y	Y	5.0815	Y	Y	9.3335	Y	Y	2.22554	Y	Y	7.33159	Y	Y	3.08011	Y	Y
A12	serum-gel	15.6416	2.66818	Y	Y	0.653156	Y	Y	0.746991	Y	Y	2.95203	Y	Y	10.3134	Y	Y	5.44951	Y	Y	2.34799	Y	Y	16.1023	Y	Y
A12	plasma-hep	15.5481	2.15117	Y	Y	2.5676	Y	Y	3.27612	Y	Y	1.14552	Y	Y	2.15456	Y	Y	0.211805	Y	Y	1.92099	Y	Y	16.5104	Y	Y
A12	serum-beads	15.9748	1.95873	Y	Y	0.58588	Y	Y	4.90281	Y	Y	5.44703	Y	Y	2.94628	Y	Y	6.16553	Y	Y	1.74029	Y	Y	11.9284	Y	Y
A13	serum-gel	5.45831	0.694064	Y	Y	2.68259	Y	Y	3.19198	Y	Y	1.17627	Y	Y	3.504	Y	Y	1.08571	Y	Y	4.2311	Y	Y	0.651738	Y	Y
A13	plasma-hep	4.88586	0.254757	Y	Y	7.48536	Y	Y	0.222594	Y	Y	11.3744	Y	Y	4.35589	Y	Y	0.134209	Y	Y	19.3336	Y	Y	9.42695	Y	Y
A13	serum-beads	4.64648	4.19202	Y	Y	2.04058	Y	Y	2.59656	Y	Y	3.3621	Y	Y	0.769431	Y	Y	3.87161	Y	Y	1.01987	Y	Y	9.60605	Y	Y
A14	serum-gel	8.82839	0.226421	Y	Y	2.71703	Y	Y	1.37665	Y	Y	1.76756	Y	Y	2.86665	Y	Y	2.91313	Y	Y	0.594564	Y	Y	2.22578	Y	Y
A14	plasma-hep	8.58505	2.47919	Y	Y	2.34452	Y	Y	5.80357	Y	Y	9.27692	Y	Y	3.68072	Y	Y	1.78216	Y	Y	0	Y	Y	12.2677	Y	Y
A14	serum-beads	8.57605	0.0765451	Y	Y	2.4422	Y	Y	3.14372	Y	Y	4.10322	Y	Y	3.5567	Y	Y	1.23889	Y	Y	0.0880033	Y	Y	8.15398	Y	Y
A15	serum-gel	17.3161	2.40808	Y	Y	0.226202	Y	Y	4.0587	Y	Y	1.67077	Y	Y	7.19092	Y	Y	0.355485	Y	Y	0.087676	Y	Y	5.70249	Y	Y
A15	plasma-hep	16.9229	1.04317	Y	Y	1.49943	Y	Y	6.69915	Y	Y	3.56702	Y	Y	1.35863	Y	Y	9.60664	Y	Y	0.43838	Y	Y	13.6105	Y	Y
A15	serum-beads	16.123	0.830193	Y	Y	2.13748	Y	Y	2.13514	Y	Y	4.44544	Y	Y	0.51189	Y	Y	5.54317	Y	Y	1.13591	Y	Y	9.31664	Y	Y
A16	serum-gel	8.22162	0.251997	Y	Y	3.55777	Y	Y	0.795495	Y	Y	1.76156	Y	Y	4.09258	Y	Y	0.806724	Y	Y	0.377124	Y	Y	1.97646	Y	Y
A16	plasma-hep	7.82063	1.85474	Y	Y	3.39743	Y	Y	7.37357	Y	Y	2.28068	Y	Y	4.09785	Y	Y	1.37732	Y	Y	4.04061	Y	Y	6.81879	Y	Y
A16	serum-beads	8.00197	0.584946	Y	Y	3.81384	Y	Y	0.765945	Y	Y	1.48842	Y	Y	1.51051	Y	Y	5.81886	Y	Y	0.479394	Y	Y	6.90438	Y	Y
A17	serum-gel	11.0864	2.15679	Y	Y	0.925331	Y	Y	0.888302	Y	Y	7.77017	Y	Y	5.50656	Y	Y	3.758	Y	Y	2.23404	Y	Y	2.45174	Y	Y
A17	plasma-hep	10.746	2.37565	Y	Y	9.63305	Y	Y	1.59448	Y	Y	2.59213	Y	Y	4.23569	Y	Y	0.0775645	Y	Y	1.59368	Y	Y	9.41449	Y	Y
A17	serum-beads	10.7751	1.22859	Y	Y	1.5493	Y	Y	0.76776	Y	Y	5.93725	Y	Y	0.127867	Y	Y	1.45271	Y	Y	3.9573	Y	Y	3.02435	Y	Y
A18	serum-gel	6.77986	1.54518	Y	Y	10.7022	Y	Y	1.6016	Y	Y	2.95357	Y	Y	1.08452	Y	Y	1.0061	Y	Y	0.210762	Y	Y	4.60251	Y	Y
A18	plasma-hep	6.765	8.3588	Y	Y	6.64771	Y	Y	3.06969	Y	Y	3.53112	Y	Y	6.58503	Y	Y	2.0207	Y	Y	n.a.	N*	N*	14.8942	Y	Y
A18	serum-beads	6.80987	3.37979	Y	Y	6.90562	Y	Y	2.38922	Y	Y	1.71969	Y	Y	0.656756	Y	Y	4.8918	Y	Y	2.45116	Y	Y	0.451842	Y	Y
A19	serum-gel	4.63951	0.672255	Y	Y	2.79858	Y	Y	4.0784	Y	Y	0.0260405	Y	Y	4.12797	Y	Y	1.67582	Y	Y	5.08206	Y	Y	13.0739	Y	Y
A19	plasma-hep	4.37556	3.45347	Y	Y	3.16307	Y	Y	0.0404871	Y	Y	1.87238	Y	Y	6.6171	Y	Y	4.86437	Y	Y	3.50053	Y	Y	0.552361	Y	Y
A19	serum-beads	4.57667	3.7939	Y	Y	3.08507	Y	Y	3.60585	Y	Y	0.792282	Y	Y	9.28827	Y	Y	1.16619	Y	Y	1.80384	Y	Y	5.89211	Y	Y
A20	serum-gel	3.94477	0.347042	Y	Y	1.48973	Y	Y	0.85866	Y	Y	3.58022	Y	Y	8.67384	Y	Y	5.42425	Y	Y	3.26209	Y	Y	6.36074	Y	Y
A20	plasma-hep	3.83444	2.01658	Y	Y	17.6354	Y	Y	7.7156	Y	Y	6.75249	Y	Y	0.944068	Y	Y	2.12065	Y	Y	28.3813	Y	Y	7.3344	Y	Y
A20	serum-beads	3.98293	0.334394	Y	Y	4.48397	Y	Y	0.728755	Y	Y	3.5352	Y	Y	7.76643	Y	Y	1.49801	Y	Y	1.18841	Y	Y	4.25278	Y	Y
A21	serum-gel	11.2387	2.10206	Y	Y	2.78817	Y	Y	2.08359	Y	Y	1.2397	Y	Y	6.54263	Y	Y	0.841741	Y	Y	0.878394	Y	Y	12.3891	Y	Y
A21	plasma-hep	10.4609	2.74544	Y	Y	1.92829	Y	Y	5.37089	Y	Y	0.347322	Y	Y	4.66369	Y	Y	3.09217	Y	Y	3.32839	Y	Y	2.48961	Y	Y
A21	serum-beads	11.0121	2.85047	Y	Y	3.89302	Y	Y	0.48179	Y	Y	1.25041	Y	Y	1.78048	Y	Y	0.805354	Y	Y	1.15975	Y	Y	2.39785	Y	Y
A22	serum-gel	14.0407	2.73636	Y	Y	5.42406	Y	Y	3.54926	Y	Y	8.23543	Y	Y	0.392837	Y	Y	1.64099	Y	Y	0.906205	Y	Y	7.98307	Y	Y
A22	plasma-hep	13.9466	0.664566	Y	Y	1.57554	Y	Y	0.461626	Y	Y	2.71802	Y	Y	0.764957	Y	Y	1.79529	Y	Y	2.75841	Y	Y	8.11834	Y	Y
A22	serum-beads	14.385	1.3309	Y	Y	7.26136	Y	Y	2.85361	Y	Y	1.96158	Y	Y	3.23575	Y	Y	1.34784	Y	Y	3.20683	Y	Y	7.42768	Y	Y
A23	serum-gel	49.3797	0.242578	Y	Y	9.4151	Y	Y	3.99082	Y	Y	4.55706	Y	Y	1.27773	Y	Y	0.170801	Y	Y	0.0742681	Y	Y	4.7361	Y	Y
A23	plasma-hep	49.8848	3.8338	Y	Y	1.12099	Y	Y	2.02614	Y	Y	4.90588	Y	Y	4.00127	Y	Y	5.53679	Y	Y	3.00511	Y	Y	5.86822	Y	Y
A23	serum-beads	51.2084	1.16786	Y	Y	13.7994	Y	Y	0.618139	Y	Y	2.44451	Y	Y	2.07633	Y	Y	3.30712	Y	Y	0.794421	Y	Y	0.530155	Y	Y
A24	serum-gel	11.1773	1.00866	Y	Y	4.55425	Y	Y	2.13022	Y	Y	1.07908	Y	Y	1.38648	Y	Y	5.23027	Y	Y	2.54692	Y	Y	1.0114	Y	Y
A24	plasma-hep	11.0883	3.08059	Y	Y	7.50801	Y	Y	2.79544	Y	Y	0.7065	Y	Y	0.751575	Y	Y	3.88869	Y	Y	4.38207	Y	Y	0.113289	Y	Y
A24	serum-beads	11.4292	1.18893	Y	Y	7.88116	Y	Y	2.23655	Y	Y	1.3002	Y	Y	0	Y	Y	1.71191	Y	Y	3.03923	Y	Y	2.06599	Y	Y
A25	serum-gel	14.0067	0.309736	Y	Y	5.5906	Y	Y	1.42483	Y	Y	1.83158	Y	Y	2.32007	Y	Y	1.33773	Y	Y	1.58242	Y	Y	0.512775	Y	Y
A25	plasma-hep	13.8736	6.91177	Y	Y	8.62731	Y	Y	0.528064	Y	Y	0.970346	Y	Y	2.37683	Y	Y	4.51135	Y	Y	2.68374	Y	Y	6.83584	Y	Y
A25	serum-beads	13.7916	2.36091	Y	Y	5.83181	Y	Y	4.57489	Y	Y	0.358449	Y	Y	0.25299	Y	Y	4.12765	Y	Y	0.989775	Y	Y	10.7694	Y	Y
A26	serum-gel	7.562	4.84018	Y	Y	9.00274	Y	Y	0.0638856	Y	Y	1.72156	Y	Y	1.14977	Y	Y	2.46923	Y	Y	2.70708	Y	Y	12.2552	Y	Y
A26	plasma-hep	7.8242	2.80413	Y	Y	2.00358	Y	Y	1.38121	Y	Y	4.25194	Y	Y	6.22487	Y	Y	4.25082	Y	Y	1.17776	Y	Y	16.4045	Y	Y
A26	serum-beads	8.32672	0.955568	Y	Y	2.1497	Y	Y	10.9989	Y	Y	0.977642	Y	Y	0.0821739	Y	Y	2.54584	Y	Y	0.702715	Y	Y	1.67444	Y	Y
Duplicate measurement CV data are from in house calibration.
serum-gel: serum from blood collected by gel separator vacuum tube; plasma-hep: plasma from blood collected by Li-heparin vacuum tube; serum-beads: serum from blood collected by beads clot activator vacuum tube; Y: yes; N: no.
* data lost due to procedural reasons

## Sheet: Suppl. Table 3
Supplemental Table 3. List of sample intra-laboratory CV and use in the study analyses of 11-deoxycortisol measurements
SUBJECT ID	Specimen/EQA	All lab median	Lab B			Lab C			Lab D			Lab E			Lab G			Lab H			Lab I			Lab L
		(nmol/L)	Duplicate measurement CV (%)	used in intra-lab study	used in inter-lab study	Duplicate measurement CV (%)	used in intra-lab study	used in inter-lab study	Duplicate measurement CV (%)	used in intra-lab study	used in inter-lab study	Duplicate measurement CV (%)	used in intra-lab study	used in inter-lab study	Duplicate measurement CV (%)	used in intra-lab study	used in inter-lab study	Duplicate measurement CV (%)	used in intra-lab study	used in inter-lab study	Duplicate measurement CV (%)	used in intra-lab study	used in inter-lab study	Duplicate measurement CV (%)	used in intra-lab study	used in inter-lab study
A01	serum-gel	0.545	6.87956	Y	Y	0.836813	Y	Y	10.3681	Y	Y	0.367328	Y	Y	n.a.	N#	N#	1.31972	Y	Y	1.29744	Y	Y	4.0732	Y	Y
A01	plasma-hep	0.545864	3.26771	Y	Y	16.7033	Y	Y	3.50631	Y	Y	18.9969	Y	Y	n.a.	N#	N#	4.06889	Y	Y	2.52538	Y	Y	1.9454	Y	Y
A01	serum-beads	0.550583	1.45597	Y	Y	4.19309	Y	Y	14.369	Y	Y	29.622	Y	Y	n.a.	N#	N#	5.35964	Y	Y	4.96215	Y	Y	8.501	Y	Y
A02£	serum-gel	0.312069	2.30485	Y	Y	n.a.	N#	N#	7.00106	Y	Y	6.92272	Y	Y	n.a.	N#	N#	4.60719	Y	Y	10.8786	Y	Y	10.1405	Y	Y
A02£	plasma-hep	0.30803	4.43725	Y	Y	n.a.	N#	N#	0	Y	Y	0	Y	Y	n.a.	N#	N#	3.51121	Y	Y	8.65845	Y	Y	9.87559	Y	Y
A02£	serum-beads	0.307218	0.410047	Y	Y	n.a.	N#	N#	16.9706	Y	Y	35.1301	Y	N	n.a.	N#	N#	3.01111	Y	Y	10.1015	Y	Y	28.7058	Y	Y
A03	serum-gel	0.625	3.61335	Y	Y	8.81842	Y	Y	3.15829	Y	Y	8.64434	Y	Y	n.a.	N#	N#	2.03281	Y	Y	1.13137	Y	Y	4.21901	Y	Y
A03	plasma-hep	0.613346	2.98917	Y	Y	13.3546	Y	Y	8.3189	Y	Y	1.10774	Y	Y	n.a.	N#	N#	2.88051	Y	Y	6.73435	Y	Y	11.5756	Y	Y
A03	serum-beads	0.620562	0.183308	Y	Y	8.55106	Y	Y	3.5533	Y	Y	26.6337	Y	Y	n.a.	N#	N#	5.8683	Y	Y	2.20971	Y	Y	3.32515	Y	Y
A04	serum-gel	1.71955	3.24897	Y	Y	2.34771	Y	Y	5.23783	Y	Y	2.26274	Y	Y	1.23692	Y	Y	2.24909	Y	Y	0.393931	Y	Y	3.44925	Y	Y
A04	plasma-hep	1.65651	2.31661	Y	Y	3.46742	Y	Y	4.65686	Y	Y	1.64763	Y	Y	6.86511	Y	Y	4.15361	Y	Y	3.17801	Y	Y	1.7339	Y	Y
A04	serum-beads	1.60947	1.29474	Y	Y	3.96508	Y	Y	4.7183	Y	Y	3.13664	Y	Y	6.14875	Y	Y	3.95031	Y	Y	1.21566	Y	Y	2.74837	Y	Y
A05	serum-gel	2.29765	1.59952	Y	Y	3.8781	Y	Y	16.4389	Y	Y	4.97353	Y	Y	6.41436	Y	Y	1.49124	Y	Y	2.04958	Y	Y	0.956175	Y	Y
A05	plasma-hep	2.19913	0.771813	Y	Y	4.14969	Y	Y	4.84252	Y	Y	3.02227	Y	Y	2.30757	Y	Y	3.91725	Y	Y	0.570247	Y	Y	7.60364	Y	Y
A05	serum-beads	2.29892	3.88571	Y	Y	1.31514	Y	Y	7.89956	Y	Y	0.192672	Y	Y	7.47602	Y	Y	2.84617	Y	Y	1.73169	Y	Y	11.0583	Y	Y
A06	serum-gel	0.39	7.71805	Y	Y	3.28887	Y	Y	16.0832	Y	Y	2.62865	Y	Y	n.a.	N#	N#	3.88884	Y	Y	3.62619	Y	Y	0.0361443	Y	Y
A06	plasma-hep	0.431113	2.96215	Y	Y	1.03986	Y	Y	12.2777	Y	Y	16.6041	Y	Y	n.a.	N#	N#	3.04813	Y	Y	3.53553	Y	Y	5.03055	Y	Y
A06	serum-beads	0.405	5.70295	Y	Y	1.83664	Y	Y	11.7426	Y	Y	18.0414	Y	Y	n.a.	N#	N#	5.67929	Y	Y	8.72971	Y	Y	5.39998	Y	Y
A07	serum-gel	0.945	0.172881	Y	Y	4.01645	Y	Y	4.80681	Y	Y	5.53388	Y	Y	n.a.	N#	N#	3.07502	Y	Y	0.748261	Y	Y	2.99363	Y	Y
A07	plasma-hep	0.837037	2.48965	Y	Y	8.02391	Y	Y	2.92596	Y	Y	14.4669	Y	Y	n.a.	N#	N#	3.54217	Y	Y	0.817464	Y	Y	1.81718	Y	Y
A07	serum-beads	0.818276	0.285849	Y	Y	2.74362	Y	Y	6.2622	Y	Y	0	Y	Y	n.a.	N#	N#	2.09851	Y	Y	1.53719	Y	Y	11.2718	Y	Y
A08	serum-gel	0.837037	1.29305	Y	Y	7.80256	Y	Y	4.81434	Y	Y	2.44298	Y	Y	n.a.	N#	N#	0.7464	Y	Y	0.817464	Y	Y	6.28846	Y	Y
A08	plasma-hep	0.818998	4.50866	Y	Y	4.52951	Y	Y	10.6128	Y	Y	1.37302	Y	Y	n.a.	N#	N#	1.33174	Y	Y	n.a.	N*	N*	7.09086	Y	Y
A08	serum-beads	0.838173	5.83228	Y	Y	5.65685	Y	Y	7.11057	Y	Y	11.7571	Y	Y	n.a.	N#	N#	2.68268	Y	Y	0.798991	Y	Y	4.45642	Y	Y
A09£	serum-gel	0.303416	4.16751	Y	Y	n.a.	N#	N#	3.95032	Y	Y	11.1423	Y	Y	n.a.	N#	N#	11.95	Y	Y	4.8766	Y	Y	1.11871	Y	Y
A09	plasma-hep	0.294406	0.0458393	Y	Y	n.a.	N#	N#	4.15945	Y	Y	0.76444	Y	Y	n.a.	N#	N#	0.183638	Y	Y	n.a.	N*	N*	6.97841	Y	Y
A09	serum-beads	0.298736	6.86651	Y	Y	n.a.	N#	N#	11.6143	Y	Y	18.4463	Y	Y	n.a.	N#	N#	2.04251	Y	Y	2.39697	Y	Y	n.a.	N#	N#
A10	serum-gel	1.17845	6.70623	Y	Y	5.37043	Y	Y	12.6707	Y	Y	n.a.	N*	N*	n.a.	N#	N#	4.86992	Y	Y	0.533665	Y	Y	24.1479	Y	Y
A10	plasma-hep	1.215	10.7177	Y	Y	6.85877	Y	Y	9.57258	Y	Y	n.a.	N*	N*	n.a.	N#	N#	7.28013	Y	Y	5.23783	Y	Y	2.22779	Y	Y
A10	serum-beads	1.22231	1.44581	Y	Y	3.75967	Y	Y	2.61568	Y	Y	n.a.	N*	N*	1.34687	N#	N#	4.37511	Y	Y	1.07955	Y	Y	18.5118	Y	Y
A11	serum-gel	2.04713	0.946976	Y	Y	12.3949	Y	Y	8.54394	Y	Y	12.0306	Y	Y	4.43007	Y	Y	5.46695	Y	Y	3.23417	Y	Y	14.1386	Y	Y
A11	plasma-hep	2.01114	1.29282	Y	Y	6.52186	Y	Y	5.75552	Y	Y	3.94605	Y	Y	16.4992	Y	Y	1.28434	Y	Y	11.0576	Y	Y	8.80015	Y	Y
A11	serum-beads	1.94736	2.95326	Y	Y	9.37214	Y	Y	10.7938	Y	Y	6.32844	Y	Y	7.36935	Y	Y	2.96847	Y	Y	11.1355	Y	Y	1.37063	Y	Y
A12	serum-gel	0.747047	3.34181	Y	Y	7.07107	Y	Y	6.83195	Y	Y	4.60442	Y	Y	n.a.	N#	N#	1.15046	Y	Y	1.76777	Y	Y	10.5025	Y	Y
A12	plasma-hep	0.76609	1.97331	Y	Y	10.4942	Y	Y	10.4553	Y	Y	2.6558	Y	Y	n.a.	N#	N#	3.02974	Y	Y	1.81309	Y	Y	10.6603	Y	Y
A12	serum-beads	0.765881	2.12015	Y	Y	1.54841	Y	Y	5.7723	Y	Y	3.4493	Y	Y	n.a.	N#	N#	1.36984	Y	Y	10.6066	Y	Y	11.6564	Y	Y
A13£	serum-gel	0.238123	8.23569	Y	Y	n.a.	N#	N#	26.5701	Y	Y	n.a.	N#	N#	n.a.	N#	N#	1.79527	Y	Y	3.00897	Y	Y	27.3653	Y	Y
A13£	plasma-hep	0.228955	0.0454624	Y	Y	n.a.	N#	N#	14.4635	Y	Y	n.a.	N#	N#	n.a.	N#	N#	0.873716	Y	Y	n.a.	N#	N#	n.a.	N#	N#
A13£	serum-beads	0.222222	0.129904	Y	Y	n.a.	N#	N#	2.24478	Y	Y	25.0909	Y	Y	n.a.	N#	N#	1.09931	Y	Y	n.a.	N#	N#	n.a.	N#	N#
A14	serum-gel	0.813947	2.41711	Y	Y	1.50448	Y	Y	13.5529	Y	Y	0.798991	Y	Y	n.a.	N#	N#	5.35523	Y	Y	0.827025	Y	Y	0.695568	Y	Y
A14	plasma-hep	0.795	2.76969	Y	Y	2.6583	Y	Y	5.59844	Y	Y	11.0088	Y	Y	n.a.	N#	N#	2.73662	Y	Y	0.889442	Y	Y	5.10168	Y	Y
A14	serum-beads	0.821163	0.844057	Y	Y	2.26073	Y	Y	9.19612	Y	Y	5.50278	Y	Y	n.a.	N#	N#	2.66681	Y	Y	1.64443	Y	Y	4.16221	Y	Y
A15	serum-gel	0.6	3.10528	Y	Y	6.73435	Y	Y	15.89	Y	Y	13.1759	Y	Y	n.a.	N#	N#	2.00856	Y	Y	4.71405	Y	Y	18.3517	Y	Y
A15	plasma-hep	0.604687	1.97586	Y	Y	0.337521	Y	Y	8.85934	Y	Y	0	Y	Y	n.a.	N#	N#	1.83394	Y	Y	1.18841	Y	Y	14.4495	Y	Y
A15	serum-beads	0.57	0.583193	Y	Y	3.51794	Y	Y	7.72794	Y	Y	1.76777	Y	Y	n.a.	N#	N#	0.0713087	Y	Y	0	Y	Y	3.27459	Y	Y
A16	serum-gel	0.535	4.58515	Y	Y	7.14249	Y	Y	13.0043	Y	Y	9.73721	Y	Y	n.a.	N#	N#	1.68834	Y	Y	1.32169	Y	Y	21.0965	Y	Y
A16	plasma-hep	0.535581	5.46274	Y	Y	7.09193	Y	Y	13.7795	Y	Y	3.3081	Y	Y	n.a.	N#	N#	2.08098	Y	Y	6.37033	Y	Y	15.2699	Y	Y
A16	serum-beads	0.537502	5.51753	Y	Y	6.40882	Y	Y	6.66751	Y	Y	3.4493	Y	Y	n.a.	N#	N#	2.0161	Y	Y	1.34687	Y	Y	2.65885	Y	Y
A17	serum-gel	0.61479	0.324083	Y	Y	8.63135	Y	Y	7.15052	Y	Y	8.81261	Y	Y	n.a.	N#	N#	4.29142	Y	Y	3.4493	Y	Y	11.3252	Y	Y
A17	plasma-hep	0.61	2.12362	Y	Y	7.21218	Y	Y	9.38176	Y	Y	13.1803	Y	Y	n.a.	N#	N#	3.91875	Y	Y	2.31838	Y	Y	16.8954	Y	Y
A17	serum-beads	0.597472	0.678541	Y	Y	11.0853	Y	Y	4.78236	Y	Y	8.06028	Y	Y	n.a.	N#	N#	0.279754	Y	Y	3.62619	Y	Y	3.22184	Y	Y
A18	serum-gel	0.6653	0.825048	Y	Y	3.17088	Y	Y	12.1036	Y	Y	13.8047	Y	Y	n.a.	N#	N#	2.89818	Y	Y	2.04958	Y	Y	1.10493	Y	Y
A18	plasma-hep	0.675403	1.51537	Y	Y	3.73801	Y	Y	0.586811	Y	Y	2.06958	Y	Y	n.a.	N#	N#	3.36955	Y	Y	n.a.	N*	N*	13.0814	Y	Y
A18	serum-beads	0.675403	5.64617	Y	Y	3.83949	Y	Y	15.1091	Y	Y	15.358	Y	Y	n.a.	N#	N#	1.33709	Y	Y	5.01494	Y	Y	4.60716	Y	Y
A19£	serum-gel	0.271761	3.92188	Y	Y	n.a.	N#	N#	7.44323	Y	Y	25.713	Y	Y	n.a.	N#	N#	2.8195	Y	Y	5.43928	Y	Y	24.1158	Y	Y
A19£	plasma-hep	0.280158	2.92267	Y	Y	n.a.	N#	N#	9.70539	Y	Y	3.9837	Y	Y	n.a.	N#	N#	2.68502	Y	Y	2.66833	Y	Y	7.56043	Y	Y
A19	serum-beads	0.29441	1.73606	Y	Y	n.a.	N#	N#	5.23783	Y	Y	11.1423	Y	Y	n.a.	N#	N#	4.36977	Y	Y	2.66833	Y	Y	16.6442	Y	Y
A20£	serum-gel	0.197774	n.a.	N#	N#	n.a.	N#	N#	8.83883	Y	Y	n.a.	N#	N#	n.a.	N#	N#	1.94632	Y	Y	n.a.	N#	N#	n.a.	N#	N#
A20£	plasma-hep	0.211035	n.a.	N#	N#	n.a.	N#	N#	8.42909	Y	Y	n.a.	N#	N#	n.a.	N#	N#	4.29097	Y	Y	n.a.	N#	N#	n.a.	N#	N#
A20£	serum-beads	0.215002	n.a.	N#	N#	n.a.	N#	N#	5.58242	Y	Y	6.14875	Y	Y	n.a.	N#	N#	3.14454	Y	Y	n.a.	N#	N#	n.a.	N#	N#
A21	serum-gel	0.432977	3.64705	Y	Y	0.995925	Y	Y	5.35687	Y	Y	0	Y	Y	n.a.	N#	N#	0.0842841	Y	Y	1.62553	Y	Y	6.82173	Y	Y
A21	plasma-hep	0.42853	1.83752	Y	Y	12.2216	Y	Y	8.62325	Y	Y	8.1814	Y	Y	n.a.	N#	N#	2.00317	Y	Y	3.36718	Y	Y	4.93707	Y	Y
A21	serum-beads	0.442559	0.0174336	Y	Y	1.49917	Y	Y	5.83644	Y	Y	5.57575	Y	Y	n.a.	N#	N#	2.22643	Y	Y	0	Y	Y	4.87149	Y	Y
A22	serum-gel	0.819907	3.1926	Y	Y	3.30068	Y	Y	6.68132	Y	Y	27.9121	Y	Y	n.a.	N#	N#	1.30688	Y	Y	1.62553	Y	Y	11.9932	Y	Y
A22	plasma-hep	0.818943	0.148991	Y	Y	8.01474	Y	Y	7.55289	Y	Y	5.94207	Y	Y	n.a.	N#	N#	1.51904	Y	Y	2.344	Y	Y	15.4448	Y	Y
A22	serum-beads	0.845696	3.07541	Y	Y	6.27467	Y	Y	13.5182	Y	Y	5.51747	Y	Y	n.a.	N#	N#	1.29944	Y	Y	6.35602	Y	Y	2.08877	Y	Y
A23	serum-gel	3.75179	3.57792	Y	Y	2.20551	Y	Y	2.64641	Y	Y	4.09917	Y	Y	2.81716	Y	Y	2.22183	Y	Y	3.1427	Y	Y	10.7236	Y	Y
A23	plasma-hep	3.91176	3.47014	Y	Y	4.542	Y	Y	5.88745	Y	Y	5.09183	Y	Y	8.65845	Y	Y	2.14379	Y	Y	4.75514	Y	Y	16.1004	Y	Y
A23	serum-beads	3.76225	0.948935	Y	Y	11.7255	Y	Y	6.13905	Y	Y	4.66104	Y	Y	6.08825	Y	Y	3.19632	Y	Y	1.71628	Y	Y	7.19148	Y	Y
A24	serum-gel	0.67	1.78283	Y	Y	27.4576	Y	Y	10.0767	Y	Y	15.5527	Y	Y	n.a.	N#	N#	3.45234	Y	Y	2.11077	Y	Y	11.8731	Y	Y
A24	plasma-hep	0.675403	3.36577	Y	Y	9.66984	Y	Y	11.3505	Y	Y	4.76701	Y	Y	n.a.	N#	N#	2.22892	Y	Y	3.05226	Y	Y	20.7702	Y	Y
A24	serum-beads	0.7	8.7099	Y	Y	0.286859	Y	Y	4.64765	Y	Y	16.9367	Y	Y	n.a.	N#	N#	0.117809	Y	Y	0	Y	Y	3.25217	Y	Y
A25	serum-gel	0.46903	0.932474	Y	Y	3.046	Y	Y	0	Y	Y	7.79488	Y	Y	n.a.	N#	N#	2.90364	Y	Y	1.45795	Y	Y	3.51246	Y	Y
A25	plasma-hep	0.485	5.1651	Y	Y	1.40021	Y	Y	15.38	Y	Y	3.73566	Y	Y	n.a.	N#	N#	0.938555	Y	Y	4.37386	Y	Y	6.38119	Y	Y
A25	serum-beads	0.485	0.246566	Y	Y	9.09728	Y	Y	4.2855	Y	Y	18.8902	Y	Y	n.a.	N#	N#	3.76331	Y	Y	1.45795	Y	Y	3.59491	Y	Y
A26	serum-gel	0.786702	5.80827	Y	Y	6.30876	Y	Y	13.1047	Y	Y	10.3768	Y	Y	n.a.	N#	N#	1.50857	Y	Y	2.51044	Y	Y	6.52462	Y	Y
A26	plasma-hep	0.845696	3.4597	Y	Y	1.31677	Y	Y	1.448	Y	Y	4.97963	Y	Y	n.a.	N#	N#	0.267694	Y	Y	2.45239	Y	Y	12.5267	Y	Y
A26	serum-beads	0.829822	1.73835	Y	Y	3.19735	Y	Y	6.47731	Y	Y	8.2841	Y	Y	n.a.	N#	N#	0.882312	Y	Y	5.46933	Y	Y	10.983	Y	Y
Duplicate measurement CV data are from in house calibration.
serum-gel: serum from blood collected by gel separator vacuum tube; plasma-hep: plasma from blood collected by Li-heparin vacuum tube; serum-beads: serum from blood collected by beads clot activator vacuum tube; Y: yes; N: no.
# result on one or both aliquots below laboratory LLOQ
CV >30%
£below the external measurement range in one or more laboratories
* data lost due to procedural reasons

## Sheet: Suppl. Table 4
Supplemental Table 3. List of sample intra-laboratory CV and use in the study analyses of cortisone measurements
SUBJECT ID	Specimen/EQA	All lab median	Lab B			Lab C			Lab D			Lab E			Lab G			Lab H			Lab I			Lab L
		(nmol/L)	Duplicate measurement CV (%)	used in intra-lab study	used in inter-lab study	Duplicate measurement CV (%)	used in intra-lab study	used in inter-lab study	Duplicate measurement CV (%)	used in intra-lab study	used in inter-lab study	Duplicate measurement CV (%)	used in intra-lab study	used in inter-lab study	Duplicate measurement CV (%)	used in intra-lab study	used in inter-lab study	Duplicate measurement CV (%)	used in intra-lab study	used in inter-lab study	Duplicate measurement CV (%)	used in intra-lab study	used in inter-lab study	Duplicate measurement CV (%)	used in intra-lab study	used in inter-lab study
A01	serum-gel	58.4516	0.214489	Y	Y	11.6084	Y	Y	0.493617	Y	Y	6.72801	Y	Y	0.045371	Y	Y	0.749241	Y	Y	0.497433	Y	Y	17.5426	Y	Y
A01	plasma-hep	60.3443	1.2839	Y	Y	6.89601	Y	Y	7.3061	Y	Y	1.38477	Y	Y	0.430914	Y	Y	7.07462	Y	Y	6.39079	Y	Y	13.0156	Y	Y
A01	serum-beads	58.1095	0.460092	Y	Y	8.61663	Y	Y	4.88185	Y	Y	3.02533	Y	Y	1.60706	Y	Y	3.36931	Y	Y	3.23198	Y	Y	19.2981	Y	Y
A02	serum-gel	56.9249	1.99816	Y	Y	12.6214	Y	Y	6.13725	Y	Y	6.33552	Y	Y	5.10752	Y	Y	2.62301	Y	Y	0.0361722	Y	Y	24.6063	Y	Y
A02	plasma-hep	53.1623	5.21474	Y	Y	16.9449	Y	Y	2.59747	Y	Y	3.18332	Y	Y	12.5364	Y	Y	0.103385	Y	Y	2.34985	Y	Y	22.7628	Y	Y
A02	serum-beads	52.4423	0.209039	Y	Y	2.15736	Y	Y	0.710976	Y	Y	4.48042	Y	N	0.427476	Y	Y	7.18745	Y	Y	1.76282	Y	Y	27.5939	Y	Y
A03	serum-gel	69.4681	2.48039	Y	Y	2.00256	Y	Y	5.06	Y	Y	3.93199	Y	Y	3.18102	Y	Y	1.09145	Y	Y	0.457417	Y	Y	18.3845	Y	Y
A03	plasma-hep	67.7961	6.17288	Y	Y	12.1712	Y	Y	0.352997	Y	Y	1.70672	Y	Y	4.11041	Y	Y	5.93734	Y	Y	6.64876	Y	Y	32.418	Y	N
A03	serum-beads	67.7388	4.50035	Y	Y	8.04842	Y	Y	3.50849	Y	Y	4.92506	Y	Y	0.187761	Y	Y	5.00695	Y	Y	0.526655	Y	Y	28.3835	Y	Y
A04	serum-gel	58.2047	3.49031	Y	Y	2.74008	Y	Y	0.357858	Y	Y	4.33969	Y	Y	7.79788	Y	Y	0.0696233	Y	Y	1.89827	Y	Y	34.0168	Y	N
A04	plasma-hep	57.0305	0.584002	Y	Y	5.16979	Y	Y	1.02793	Y	Y	4.6786	Y	Y	2.13536	Y	Y	7.31252	Y	Y	1.06332	Y	Y	32.9169	Y	N
A04	serum-beads	57.5999	2.88108	Y	Y	7.90022	Y	Y	0.0973115	Y	Y	5.34355	Y	Y	1.53707	Y	Y	11.8048	Y	Y	1.03502	Y	Y	20.6071	Y	Y
A05	serum-gel	65.5266	0.970447	Y	Y	11.5462	Y	Y	2.41812	Y	Y	6.15648	Y	Y	6.0099	Y	Y	1.88941	Y	Y	0.844711	Y	Y	36.4339	Y	N
A05	plasma-hep	66.4282	2.26992	Y	Y	4.31022	Y	Y	0.0907129	Y	Y	2.68704	Y	Y	2.18717	Y	Y	7.0624	Y	Y	0.345484	Y	Y	26.2508	Y	Y
A05	serum-beads	66.7345	0.0412685	Y	Y	3.15716	Y	Y	0.824541	Y	Y	6.88315	Y	Y	0.454793	Y	Y	2.67207	Y	Y	0.833367	Y	Y	25.9385	Y	Y
A06	serum-gel	60.3605	0.292957	Y	Y	8.61068	Y	Y	5.16637	Y	Y	1.42056	Y	Y	1.89215	Y	Y	2.51108	Y	Y	3.88084	Y	Y	19.0837	Y	Y
A06	plasma-hep	62.2075	2.17486	Y	Y	9.2424	Y	Y	3.35728	Y	Y	3.42253	Y	Y	3.2963	Y	Y	11.9742	Y	Y	3.62503	Y	Y	0.825716	Y	Y
A06	serum-beads	60.0432	0.680167	Y	Y	1.11606	Y	Y	2.8797	Y	Y	5.23652	Y	Y	3.00483	Y	Y	6.6127	Y	Y	6.39939	Y	Y	0.244567	Y	Y
A07	serum-gel	60.7058	1.94955	Y	Y	3.41536	Y	Y	0.474508	Y	Y	2.97658	Y	Y	4.91627	Y	Y	2.5856	Y	Y	1.59811	Y	Y	1.90422	Y	Y
A07	plasma-hep	61.1694	1.50628	Y	Y	2.48594	Y	Y	1.2317	Y	Y	4.44866	Y	Y	0.270156	Y	Y	9.29438	Y	Y	5.64481	Y	Y	1.15409	Y	Y
A07	serum-beads	62.158	0.853082	Y	Y	7.87092	Y	Y	0.471158	Y	Y	4.5736	Y	Y	1.98314	Y	Y	3.66733	Y	Y	7.28676	Y	Y	3.43883	Y	Y
A08	serum-gel	64.4023	4.24904	Y	Y	6.13135	Y	Y	1.16584	Y	Y	3.58288	Y	Y	0.817956	Y	Y	7.08657	Y	Y	2.6183	Y	Y	0.204079	Y	Y
A08	plasma-hep	63.1769	0.606003	Y	Y	8.05175	Y	Y	0.652012	Y	Y	2.17446	Y	Y	0.3032	Y	Y	6.5541	Y	Y	n.a.	N*	N*	4.65773	Y	Y
A08	serum-beads	61.8424	0.932454	Y	Y	0.264677	Y	Y	4.39796	Y	Y	2.66483	Y	Y	1.64028	Y	Y	8.46209	Y	Y	0.992431	Y	Y	2.41732	Y	Y
A09	serum-gel	69.4885	1.60211	Y	Y	0.146277	Y	Y	1.22638	Y	Y	3.77063	Y	Y	0.389748	Y	Y	0.875168	Y	Y	1.96554	Y	Y	4.43137	Y	Y
A09	plasma-hep	68.5023	4.32415	Y	Y	7.8518	Y	Y	0.979418	Y	Y	4.46949	Y	Y	4.13254	Y	Y	1.43763	Y	Y	n.a.	N*	N*	1.25925	Y	Y
A09	serum-beads	68.167	1.14902	Y	Y	7.68738	Y	Y	1.36892	Y	Y	1.47609	Y	Y	5.26574	Y	Y	3.00279	Y	Y	2.30651	Y	Y	0.521467	Y	Y
A10	serum-gel	70.3371	7.79047	Y	Y	7.10911	Y	Y	1.37373	Y	Y	1.75975	Y	Y	5.09499	Y	Y	3.36191	Y	Y	0.726998	Y	Y	1.15603	Y	Y
A10	plasma-hep	67.3306	7.97494	Y	Y	9.1504	Y	Y	4.13997	Y	Y	1.81089	Y	Y	1.58018	Y	Y	1.16182	Y	Y	3.22918	Y	Y	2.35954	Y	Y
A10	serum-beads	67.6687	0.631815	Y	Y	6.52978	Y	Y	0.0923135	Y	Y	0.668248	Y	Y	0.757987	Y	Y	2.72403	Y	Y	0.235072	Y	Y	5.23383	Y	Y
A11	serum-gel	58.9509	0.245855	Y	Y	11.6707	Y	Y	1.90476	Y	Y	8.01506	Y	Y	4.88627	Y	Y	0.422471	Y	Y	1.59295	Y	Y	10.5928	Y	Y
A11	plasma-hep	55.8542	1.79477	Y	Y	7.76317	Y	Y	2.15195	Y	Y	6.45413	Y	Y	1.47326	Y	Y	8.7055	Y	Y	6.08569	Y	Y	0.192475	Y	Y
A11	serum-beads	56.289	0.72151	Y	Y	8.11585	Y	Y	4.75475	Y	Y	3.30034	Y	Y	0.536076	Y	Y	3.11361	Y	Y	6.64162	Y	Y	2.50658	Y	Y
A12	serum-gel	45.8473	0.968306	Y	Y	3.88543	Y	Y	0.567737	Y	Y	4.84079	Y	Y	2.24288	Y	Y	2.18666	Y	Y	3.23707	Y	Y	9.61987	Y	Y
A12	plasma-hep	44.5414	0.555236	Y	Y	0.477187	Y	Y	1.75785	Y	Y	2.67919	Y	Y	2.64436	Y	Y	7.50478	Y	Y	1.48833	Y	Y	4.95997	Y	Y
A12	serum-beads	44.9174	0.243753	Y	Y	3.58816	Y	Y	3.10001	Y	Y	4.50272	Y	Y	0.267225	Y	Y	9.86672	Y	Y	2.08226	Y	Y	4.63559	Y	Y
A13	serum-gel	42.0311	2.17894	Y	Y	9.5933	Y	Y	0.646401	Y	Y	1.76205	N#	N#	2.81636	Y	Y	1.12678	Y	Y	2.77416	Y	Y	6.17169	Y	Y
A13	plasma-hep	41.2288	0.512431	Y	Y	11.4874	Y	Y	0.993637	Y	Y	3.72289	N#	N#	3.35452	Y	Y	7.14449	Y	Y	15.4271	Y	Y	10.3875	Y	Y
A13	serum-beads	40.3748	3.29664	Y	Y	2.6166	Y	Y	0.256174	Y	Y	6.90623	Y	Y	2.15015	Y	Y	13.7557	Y	Y	2.95078	Y	Y	2.83255	Y	Y
A14	serum-gel	55.9744	1.6353	Y	Y	7.15038	Y	Y	2.60001	Y	Y	2.90422	Y	Y	11.199	Y	Y	5.26997	Y	Y	0.655817	Y	Y	4.75007	Y	Y
A14	plasma-hep	55.0002	0.976505	Y	Y	8.07737	Y	Y	1.81534	Y	Y	3.52763	Y	Y	1.99319	Y	Y	0.983943	Y	Y	0.724	Y	Y	1.09853	Y	Y
A14	serum-beads	53.9538	3.28431	Y	Y	11.2932	Y	Y	3.26095	Y	Y	5.69851	Y	Y	1.86225	Y	Y	23.0897	Y	Y	2.58304	Y	Y	7.48037	Y	Y
A15	serum-gel	44.6431	3.16867	Y	Y	4.55154	Y	Y	0.427094	Y	Y	1.28814	Y	Y	2.28985	Y	Y	1.55326	Y	Y	0.719781	Y	Y	4.60321	Y	Y
A15	plasma-hep	44.2544	0.238816	Y	Y	8.32335	Y	Y	1.76634	Y	Y	5.40841	Y	Y	0.208235	Y	Y	13.4932	Y	Y	0.837875	Y	Y	10.1427	Y	Y
A15	serum-beads	41.812	0.985871	Y	Y	1.0975	Y	Y	2.89103	Y	Y	3.80827	Y	Y	1.6004	Y	Y	12.234	Y	Y	2.49157	Y	Y	9.59957	Y	Y
A16	serum-gel	49.7864	0.50444	Y	Y	3.31574	Y	Y	1.20024	Y	Y	2.85881	Y	Y	0.64576	Y	Y	4.02186	Y	Y	1.13981	Y	Y	6.57106	Y	Y
A16	plasma-hep	48.3542	0.883214	Y	Y	0.42153	Y	Y	0.825124	Y	Y	3.50747	Y	Y	2.88165	Y	Y	9.30336	Y	Y	2.53007	Y	Y	2.59663	Y	Y
A16	serum-beads	48.2442	1.91372	Y	Y	8.57726	Y	Y	3.42622	Y	Y	2.47348	Y	Y	0.456371	Y	Y	23.3603	Y	Y	0.969042	Y	Y	1.52959	Y	Y
A17	serum-gel	47.5546	0.202684	Y	Y	4.22703	Y	Y	1.4676	Y	Y	3.93996	Y	Y	3.4465	Y	Y	5.55899	Y	Y	1.20402	Y	Y	0.142699	Y	Y
A17	plasma-hep	49.4422	1.53453	Y	Y	7.4263	Y	Y	0.892953	Y	Y	5.47341	Y	Y	5.25642	Y	Y	2.56735	Y	Y	1.17059	Y	Y	1.97258	Y	Y
A17	serum-beads	44.6647	0.661263	Y	Y	11.2117	Y	Y	1.64315	Y	Y	2.52991	Y	Y	0.182915	Y	Y	19.4108	Y	Y	0.670709	Y	Y	8.44291	Y	Y
A18	serum-gel	50.2797	1.34494	Y	Y	2.30356	Y	Y	0.376141	Y	Y	2.67142	Y	Y	4.39767	Y	Y	7.04479	Y	Y	1.23243	Y	Y	3.15932	Y	Y
A18	plasma-hep	49.76	7.67446	Y	Y	5.944	Y	Y	3.13312	Y	Y	2.82032	Y	Y	1.87577	Y	Y	0.0618659	Y	Y	n.a.	N*	N*	23.2049	Y	Y
A18	serum-beads	49.785	2.06403	Y	Y	8.2169	Y	Y	0.124944	Y	Y	3.95046	Y	Y	3.51836	Y	Y	10.1119	Y	Y	0.846668	Y	Y	3.47865	Y	Y
A19	serum-gel	39.855	1.59329	Y	Y	5.16889	Y	Y	1.64018	Y	Y	5.11835	Y	Y	1.48263	Y	Y	2.67696	Y	Y	1.03973	Y	Y	10.2261	Y	Y
A19	plasma-hep	38.1115	6.14097	Y	Y	15.7631	Y	Y	0.961121	Y	Y	1.08559	Y	Y	3.25693	Y	Y	3.00452	Y	Y	0.279627	Y	Y	1.97249	Y	Y
A19	serum-beads	38.274	2.41649	Y	Y	1.52552	Y	Y	2.53161	Y	Y	2.9723	Y	Y	6.33866	Y	Y	12.7991	Y	Y	3.25269	Y	Y	3.96033	Y	Y
A20	serum-gel	39.2315	0.290119	Y	Y	2.47408	Y	Y	1.19745	Y	Y	2.70885	N#	N#	6.29362	Y	Y	7.22894	Y	Y	0.0529206	Y	Y	9.94948	Y	Y
A20	plasma-hep	38.8591	0.716027	Y	Y	12.3439	Y	Y	1.84787	Y	Y	4.28672	N#	N#	3.12445	Y	Y	12.6029	Y	Y	25.3189	Y	Y	0.267824	Y	Y
A20	serum-beads	39.631	2.3872	Y	Y	8.47075	Y	Y	1.46204	Y	Y	4.90038	Y	Y	1.15752	Y	Y	10.8144	Y	Y	0.640072	Y	Y	7.08539	Y	Y
A21	serum-gel	68.182	0.920164	Y	Y	0.256364	Y	Y	0.79401	Y	Y	2.6086	Y	Y	4.28196	Y	Y	2.04706	Y	Y	0.449866	Y	Y	2.09092	Y	Y
A21	plasma-hep	68.4172	3.68771	Y	Y	6.5852	Y	Y	0.654872	Y	Y	3.26761	Y	Y	0.0595709	Y	Y	3.8583	Y	Y	0.148729	Y	Y	2.77128	Y	Y
A21	serum-beads	67.4976	0.867529	Y	Y	0.432196	Y	Y	3.51493	Y	Y	3.52959	Y	Y	0.396024	Y	Y	6.97006	Y	Y	0.0201197	Y	Y	1.98955	Y	Y
A22	serum-gel	75.6158	0.489622	Y	Y	3.5939	Y	Y	0.181948	Y	Y	2.14531	Y	Y	4.27936	Y	Y	2.3618	Y	Y	2.75843	Y	Y	0.975329	Y	Y
A22	plasma-hep	74.9932	1.5157	Y	Y	7.01309	Y	Y	0.00547741	Y	Y	4.58774	Y	Y	4.06577	Y	Y	1.71196	Y	Y	3.09783	Y	Y	3.22623	Y	Y
A22	serum-beads	73.4237	5.35704	Y	Y	6.93902	Y	Y	1.4188	Y	Y	2.44594	Y	Y	0.386471	Y	Y	17.3171	Y	Y	5.75629	Y	Y	10.893	Y	Y
A23	serum-gel	59.86	0.721869	Y	Y	2.15007	Y	Y	0.71678	Y	Y	1.74521	Y	Y	2.61739	Y	Y	5.78161	Y	Y	0.939242	Y	Y	1.58756	Y	Y
A23	plasma-hep	56.1237	3.17924	Y	Y	0.332168	Y	Y	2.0516	Y	Y	6.51917	Y	Y	4.60812	Y	Y	6.31494	Y	Y	1.12088	Y	Y	3.98259	Y	Y
A23	serum-beads	56.6331	1.60001	Y	Y	18.6061	Y	Y	1.4731	Y	Y	3.98965	Y	Y	0.103052	Y	Y	16.9965	Y	Y	0.874284	Y	Y	5.42666	Y	Y
A24	serum-gel	63.1349	2.12059	Y	Y	11.7828	Y	Y	3.68039	Y	Y	3.64576	Y	Y	8.81827	Y	Y	1.28472	Y	Y	1.48038	Y	Y	0.954081	Y	Y
A24	plasma-hep	60.8587	0.547884	Y	Y	6.35775	Y	Y	0.574222	Y	Y	5.9381	Y	Y	0.190489	Y	Y	1.55506	Y	Y	3.55507	Y	Y	0.912366	Y	Y
A24	serum-beads	59.2529	2.16551	Y	Y	7.27221	Y	Y	1.25879	Y	Y	5.99486	Y	Y	2.67235	Y	Y	3.73829	Y	Y	0.187899	Y	Y	8.99671	Y	Y
A25	serum-gel	43.372	1.79943	Y	Y	4.97952	Y	Y	1.52245	Y	Y	6.54601	Y	Y	0.956627	Y	Y	6.86899	Y	Y	1.45893	Y	Y	3.19462	Y	Y
A25	plasma-hep	43.6901	2.90856	Y	Y	0.881023	Y	Y	0.181158	Y	Y	3.60493	Y	Y	5.57869	Y	Y	14.5564	Y	Y	1.37302	Y	Y	3.13377	Y	Y
A25	serum-beads	42.0492	2.75773	Y	Y	5.97456	Y	Y	5.26941	Y	Y	5.16903	Y	Y	0.626096	Y	Y	10.27	Y	Y	0.41772	Y	Y	0.896131	Y	Y
A26	serum-gel	53.5175	2.59293	Y	Y	10.2139	Y	Y	0.0239784	Y	Y	1.01842	Y	Y	0.931699	Y	Y	3.16683	Y	Y	0.665199	Y	Y	3.10357	Y	Y
A26	plasma-hep	53.2355	0.604253	Y	Y	4.81324	Y	Y	3.91332	Y	Y	1.65572	Y	Y	0.184245	Y	Y	12.1053	Y	Y	0.907355	Y	Y	5.04973	Y	Y
A26	serum-beads	50.0015	1.05656	Y	Y	4.34516	Y	Y	18.722	Y	Y	6.21107	Y	Y	4.96307	Y	Y	4.45227	Y	Y	1.45875	Y	Y	0.902469	Y	Y
Duplicate measurement CV data are from in house calibration.
serum-gel: serum from blood collected by gel separator vacuum tube; plasma-hep: plasma from blood collected by Li-heparin vacuum tube; serum-beads: serum from blood collected by beads clot activator vacuum tube; Y: yes; N: no.
# result on one or both aliquots below laboratory LLOQ
CV >30%
* data lost due to procedural reasons
